# Supplementary figures and images for: Early Discontinuation of Buprenorphine Therapy for Opioid Use Disorder Among Privately Insured Adults
Source: Atypon-hosted journal article supplement (doi:10.1176/appi.ps.201900309), 2020-04-08

## Online Supplement: Consort diagram of sample selection

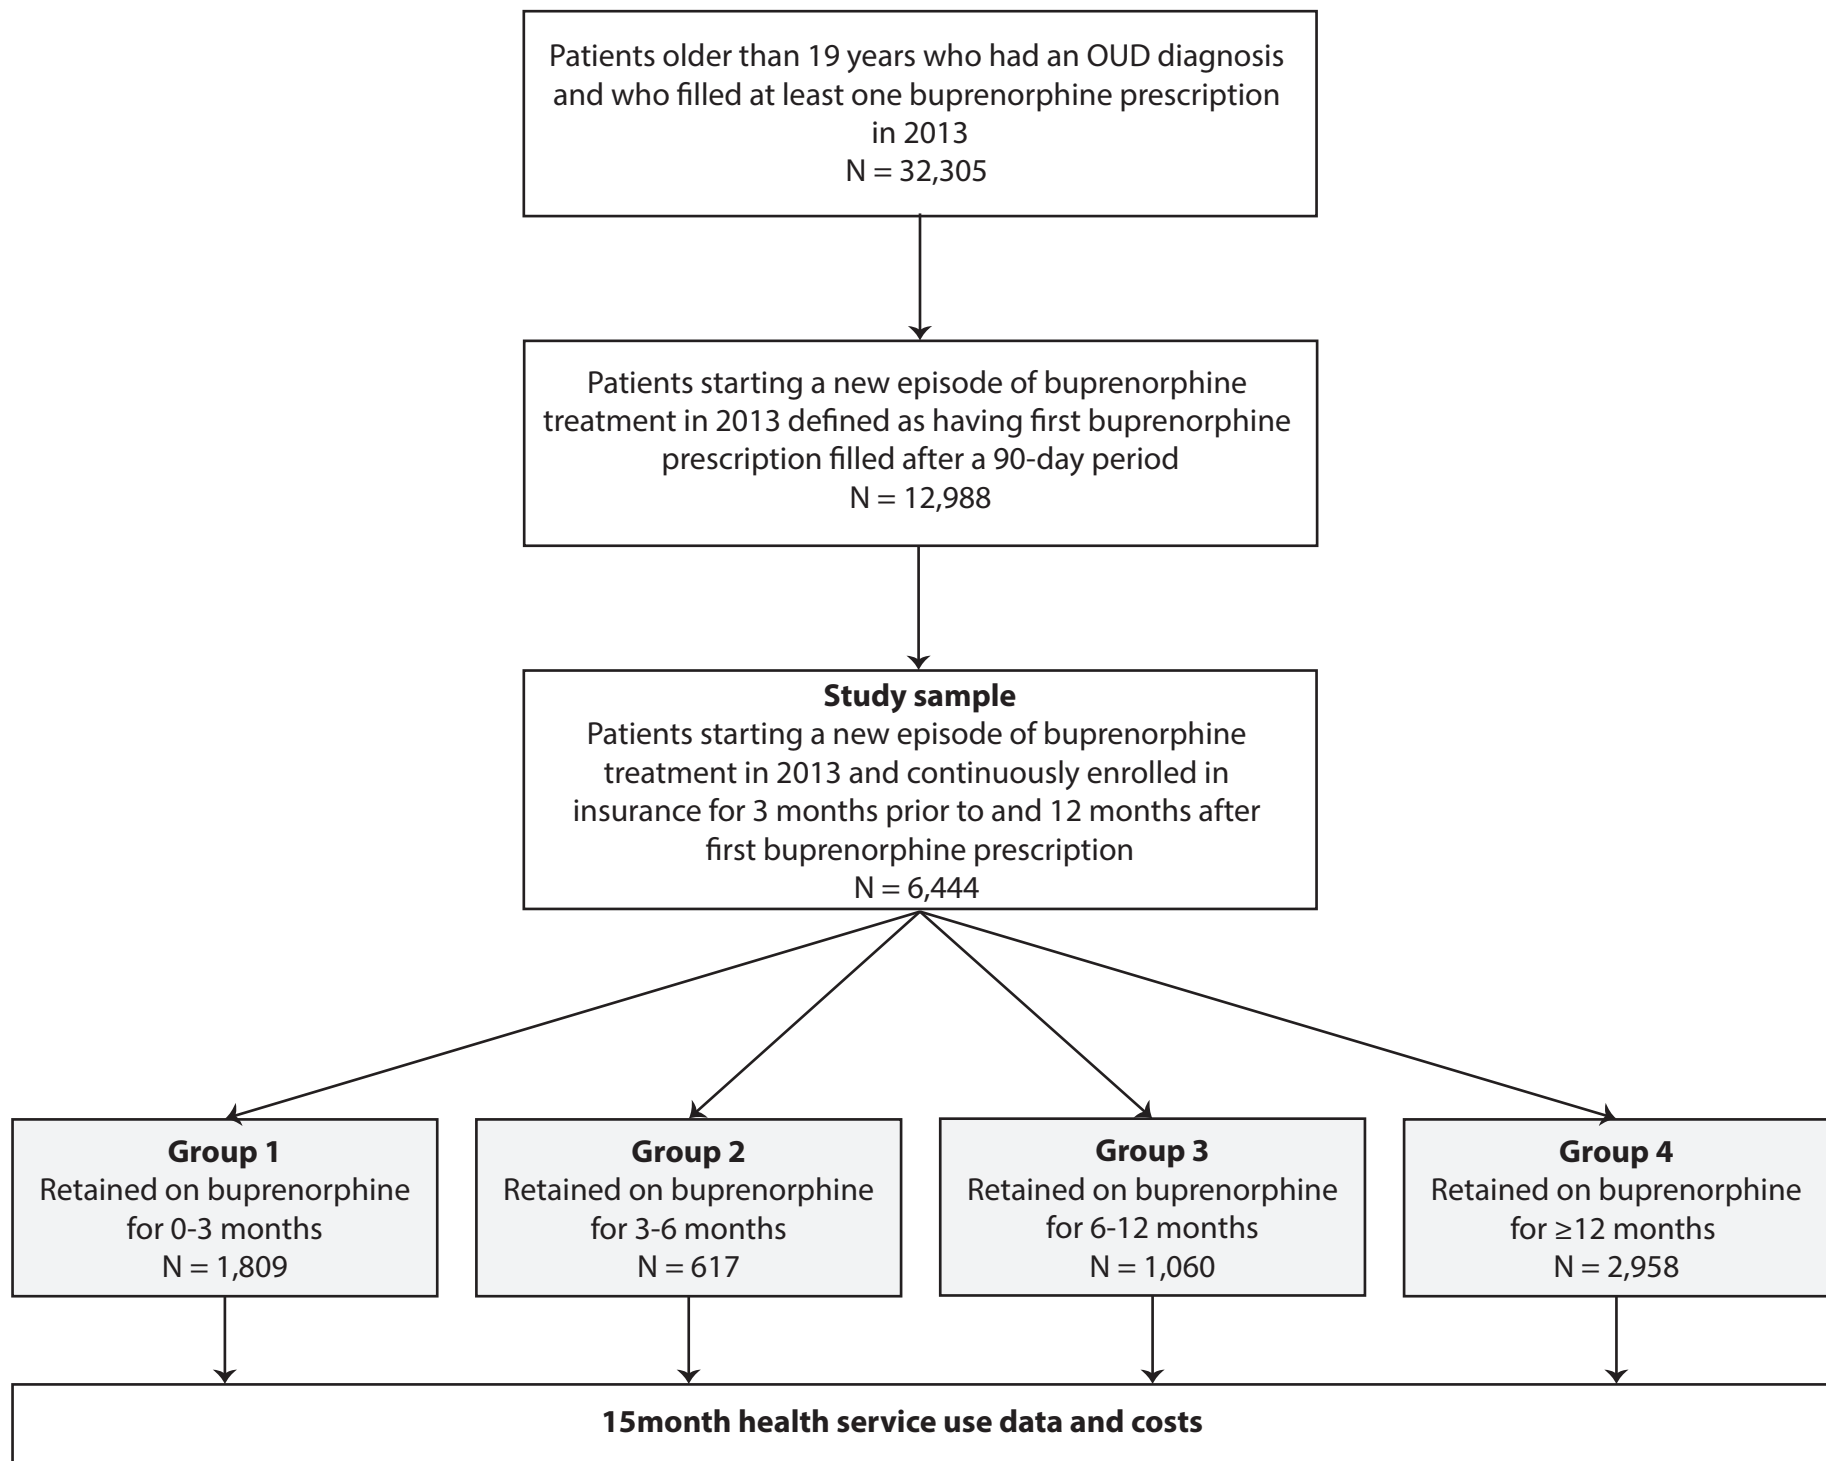

Supplement: appi.ps.201900309.ds001.pdf [file appi.ps.201900309.ds001.pdf]
